# Supplementary figures and images for: TidyMass: An Object-oriented Reproducible Analysis Framework for LC-MS Data
Source: Research Square preprint supplement (doi:10.21203/rs.3.rs-1455891/v1), 2022-03-28

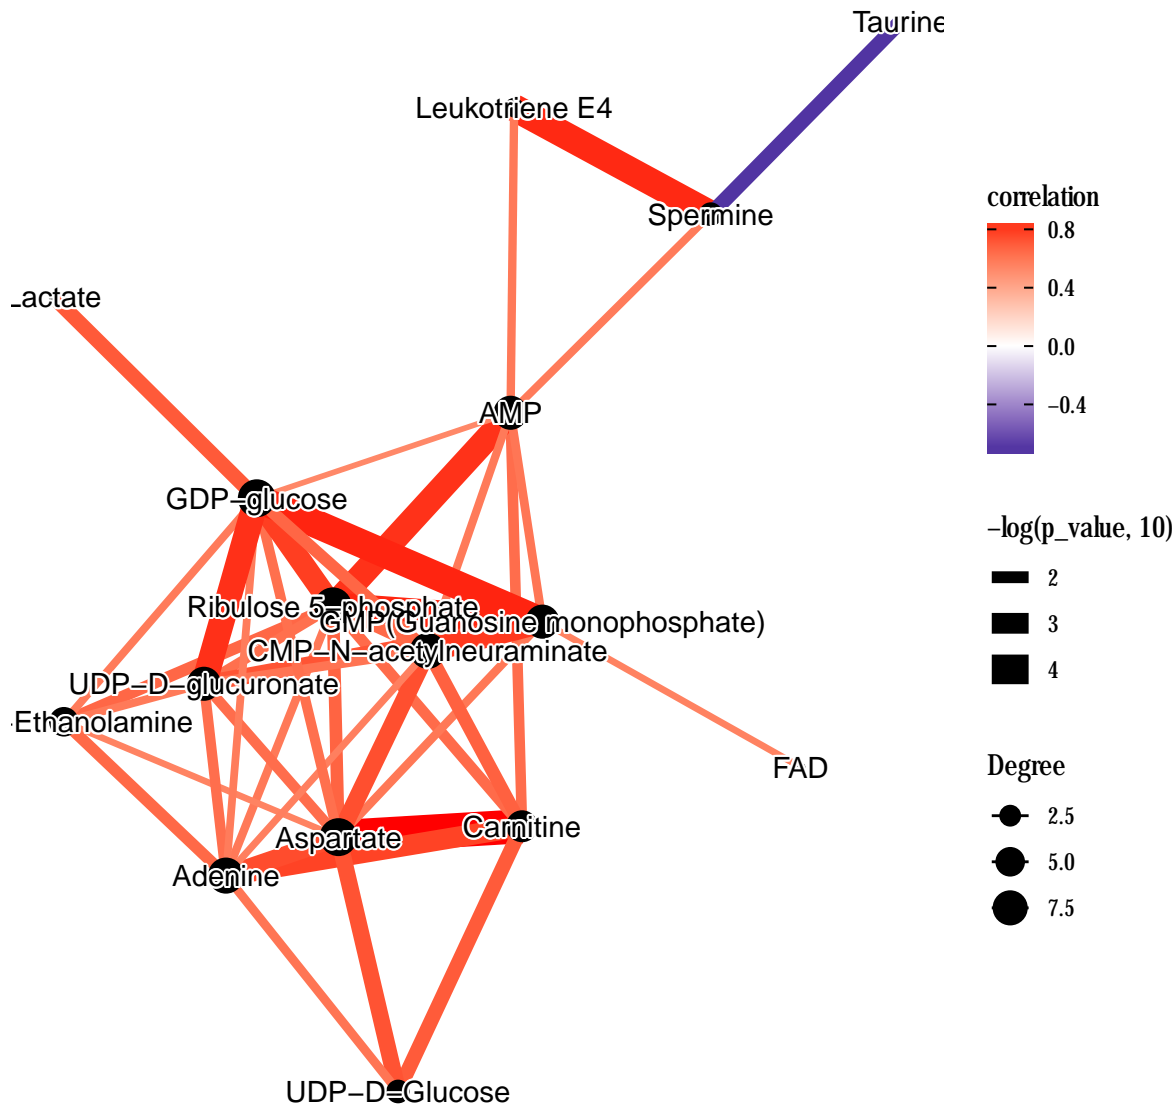

Supplement: Supplementary file 1 [file female_cor_network.pdf › Supplementary Data 1/pathway_enrichment/female_cor_network.pdf]

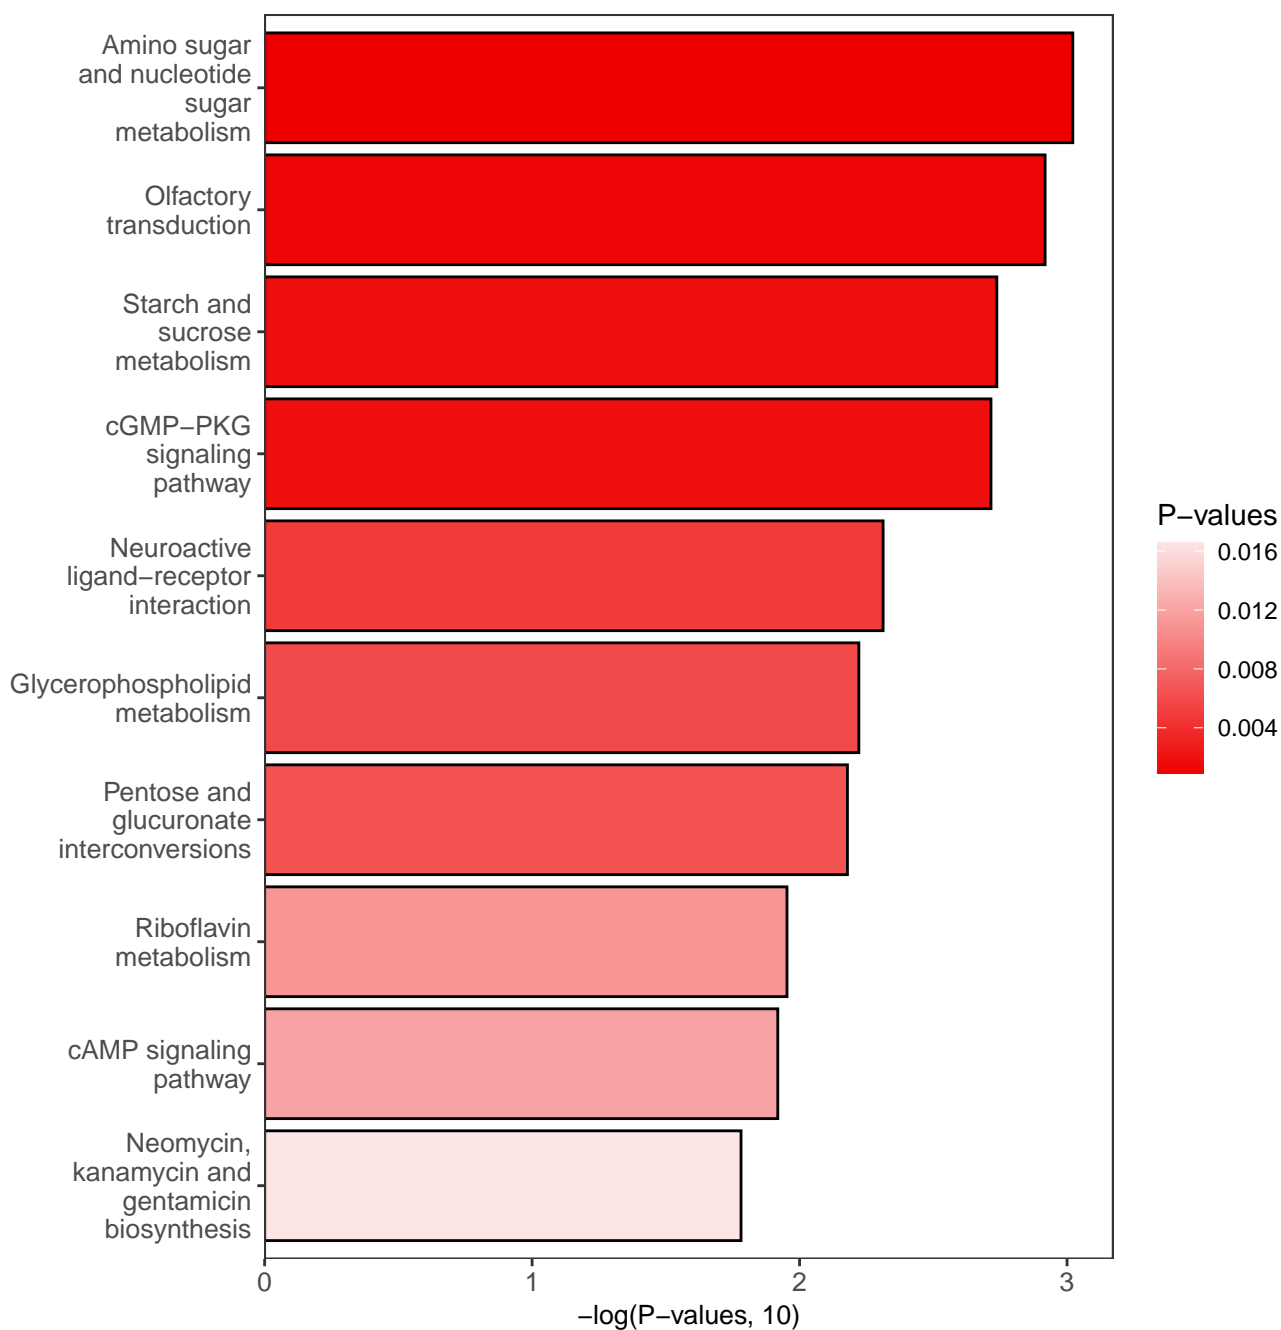

Supplement: Supplementary file 2 [file female_pathway_bar.pdf › Supplementary Data 1/pathway_enrichment/female_pathway_bar.pdf]

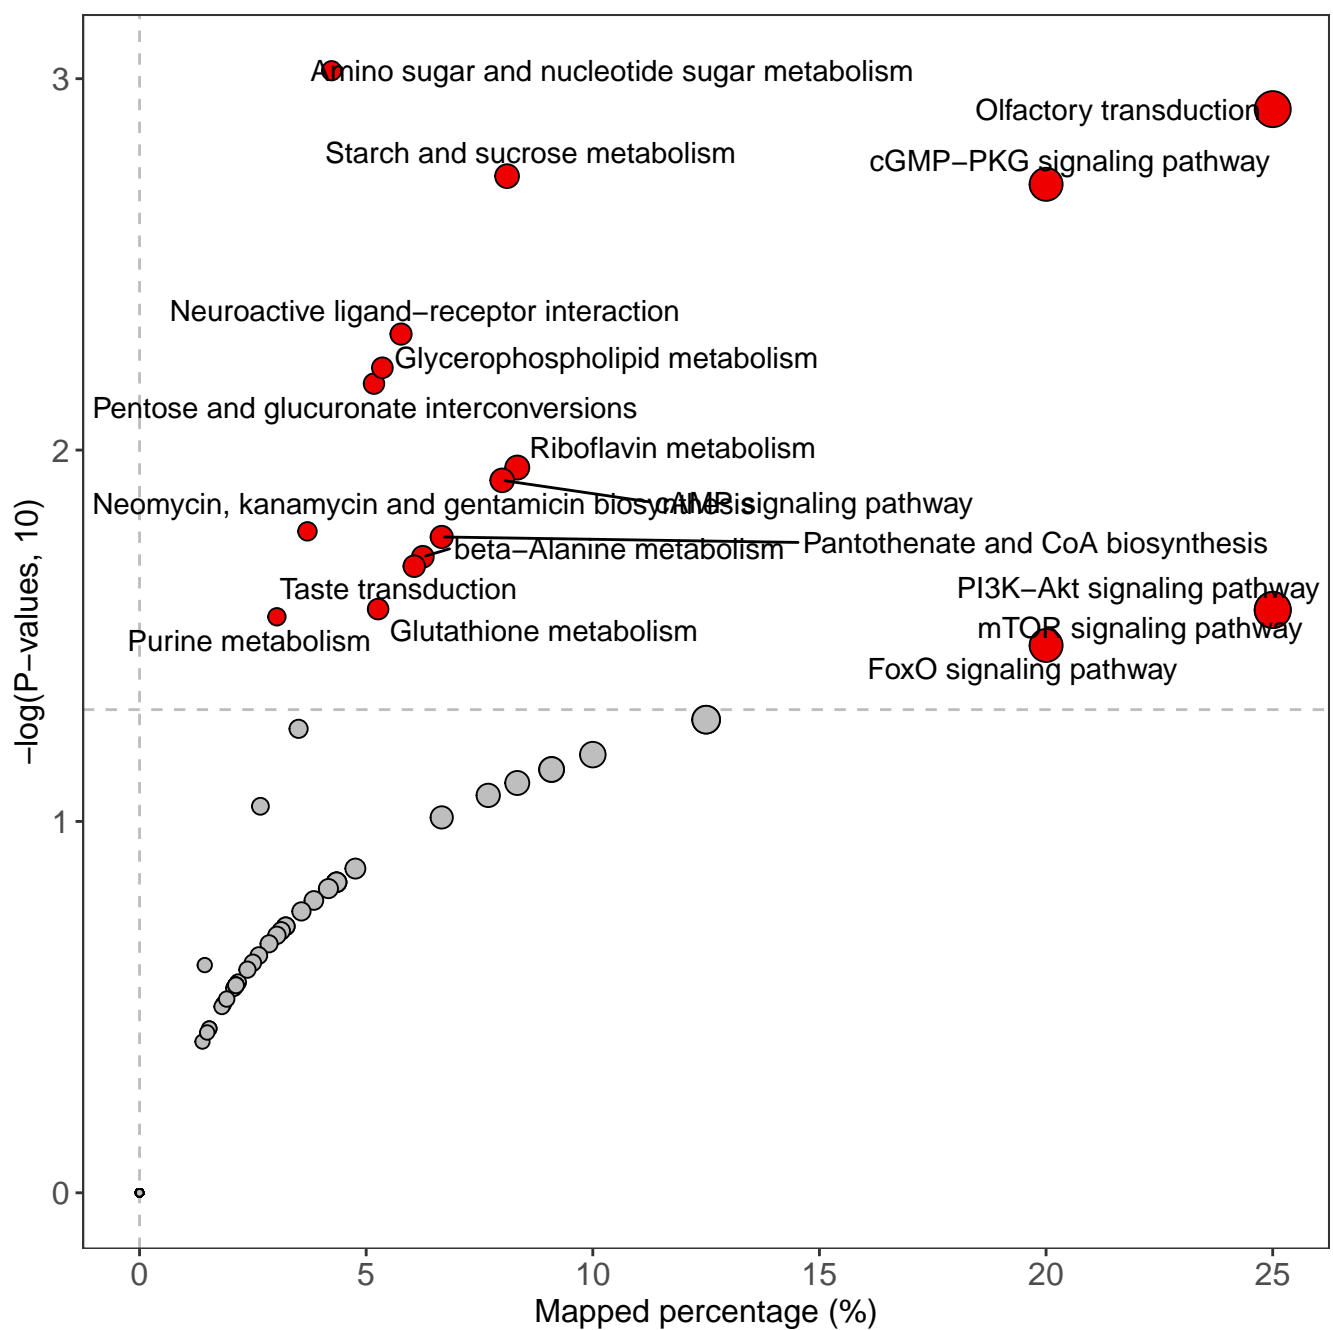

Supplement: Supplementary file 3 [file female_pathway_scatter.pdf › Supplementary Data 1/pathway_enrichment/female_pathway_scatter.pdf]

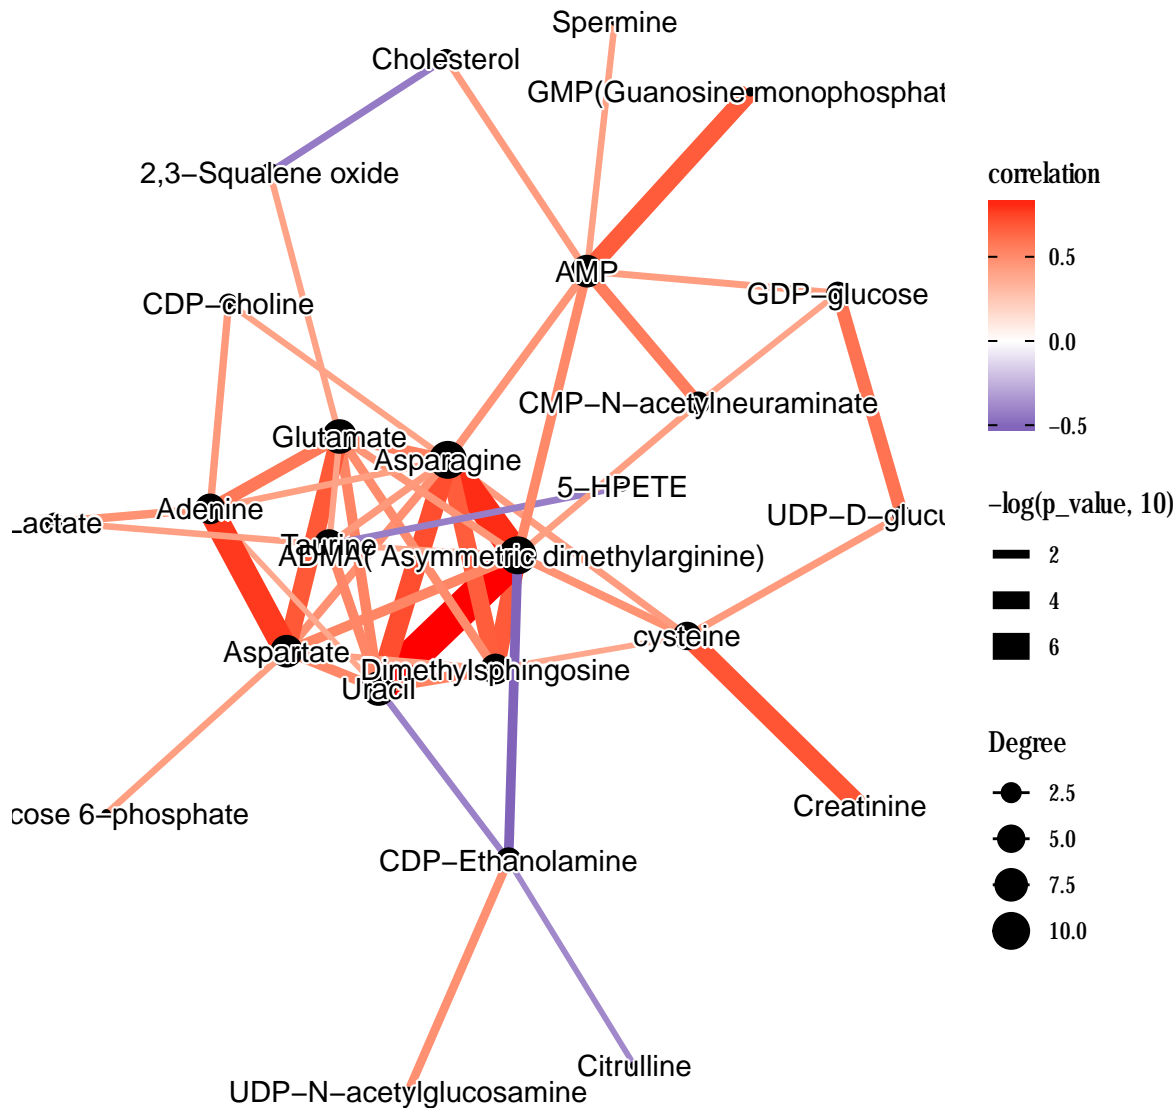

Supplement: Supplementary file 4 [file male_cor_network.pdf › Supplementary Data 1/pathway_enrichment/male_cor_network.pdf]

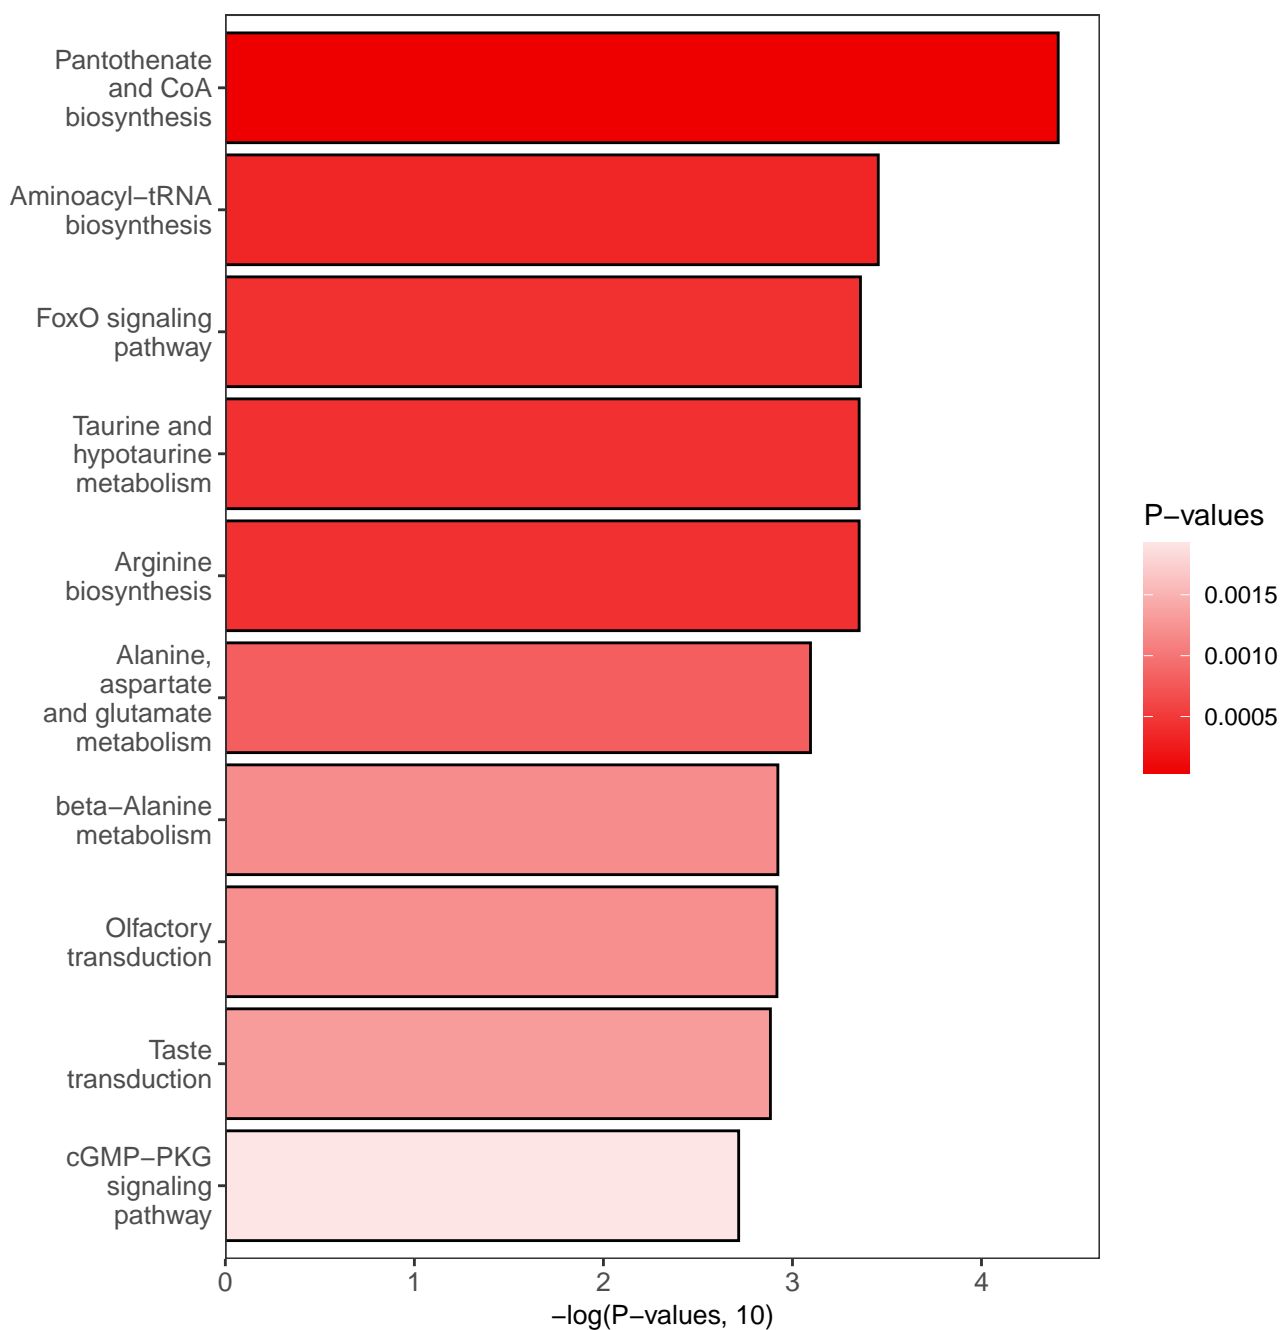

Supplement: Supplementary file 5 [file male_pathway_bar.pdf › Supplementary Data 1/pathway_enrichment/male_pathway_bar.pdf]

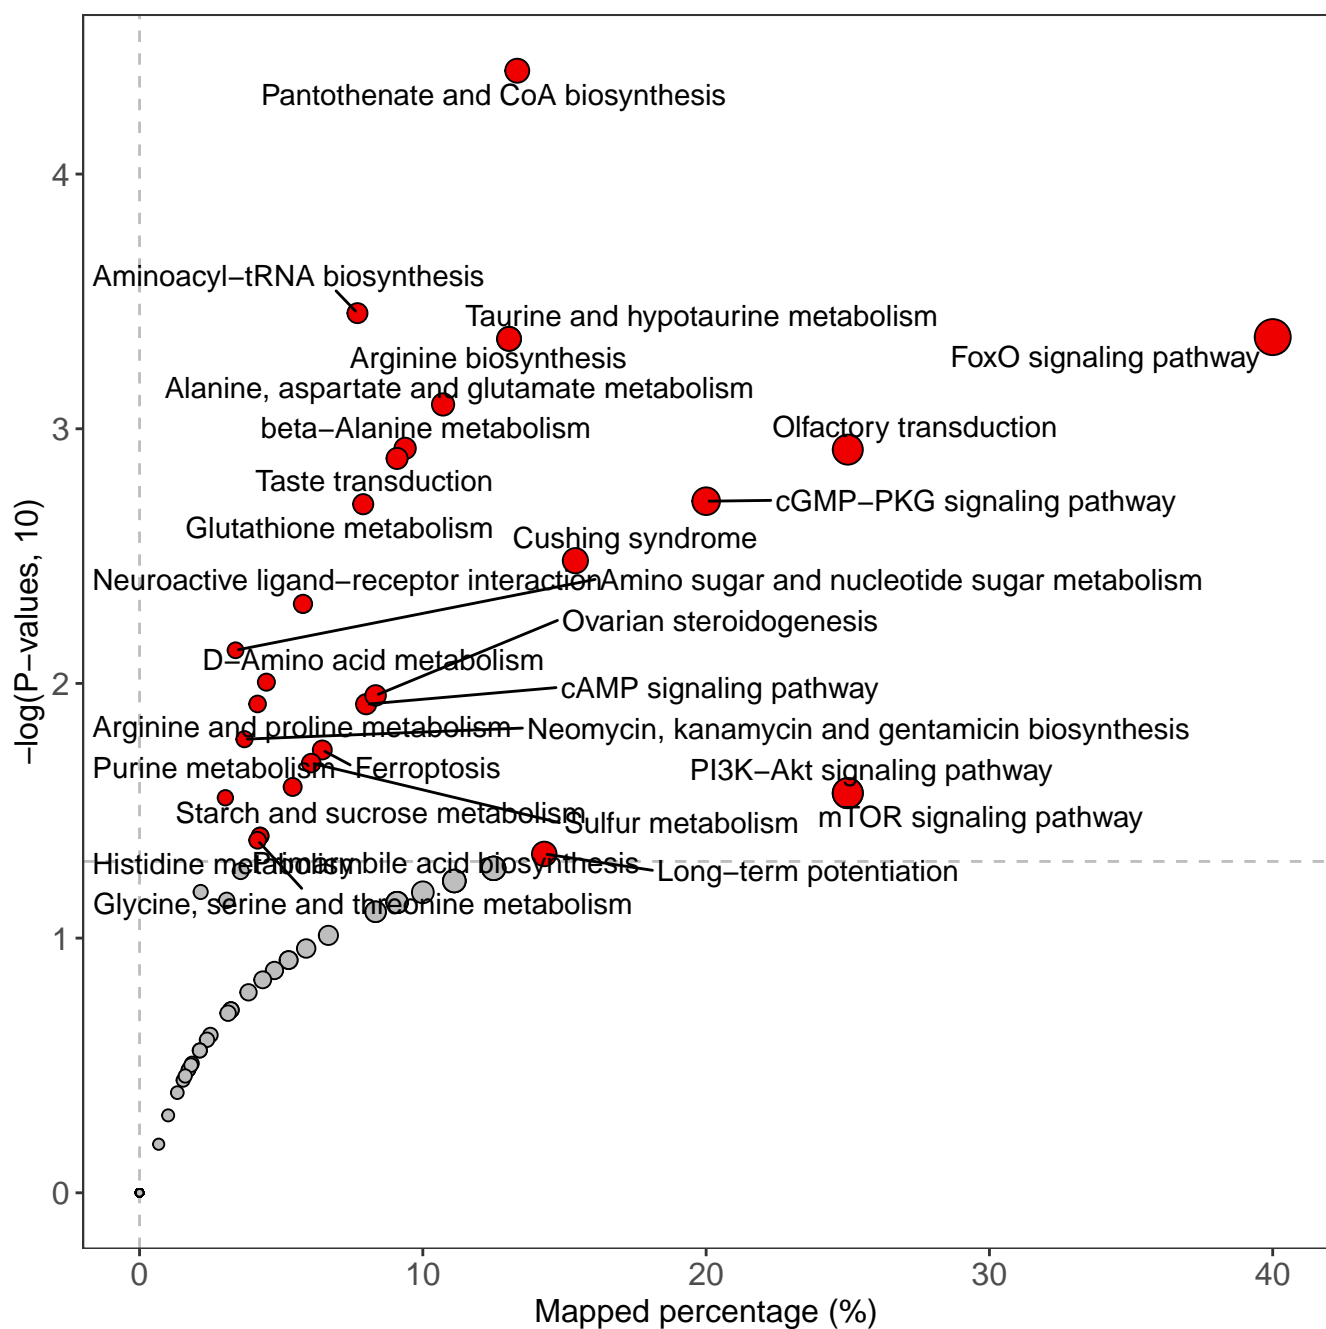

Supplement: Supplementary file 6 [file male_pathway_scatter.pdf › Supplementary Data 1/pathway_enrichment/male_pathway_scatter.pdf]

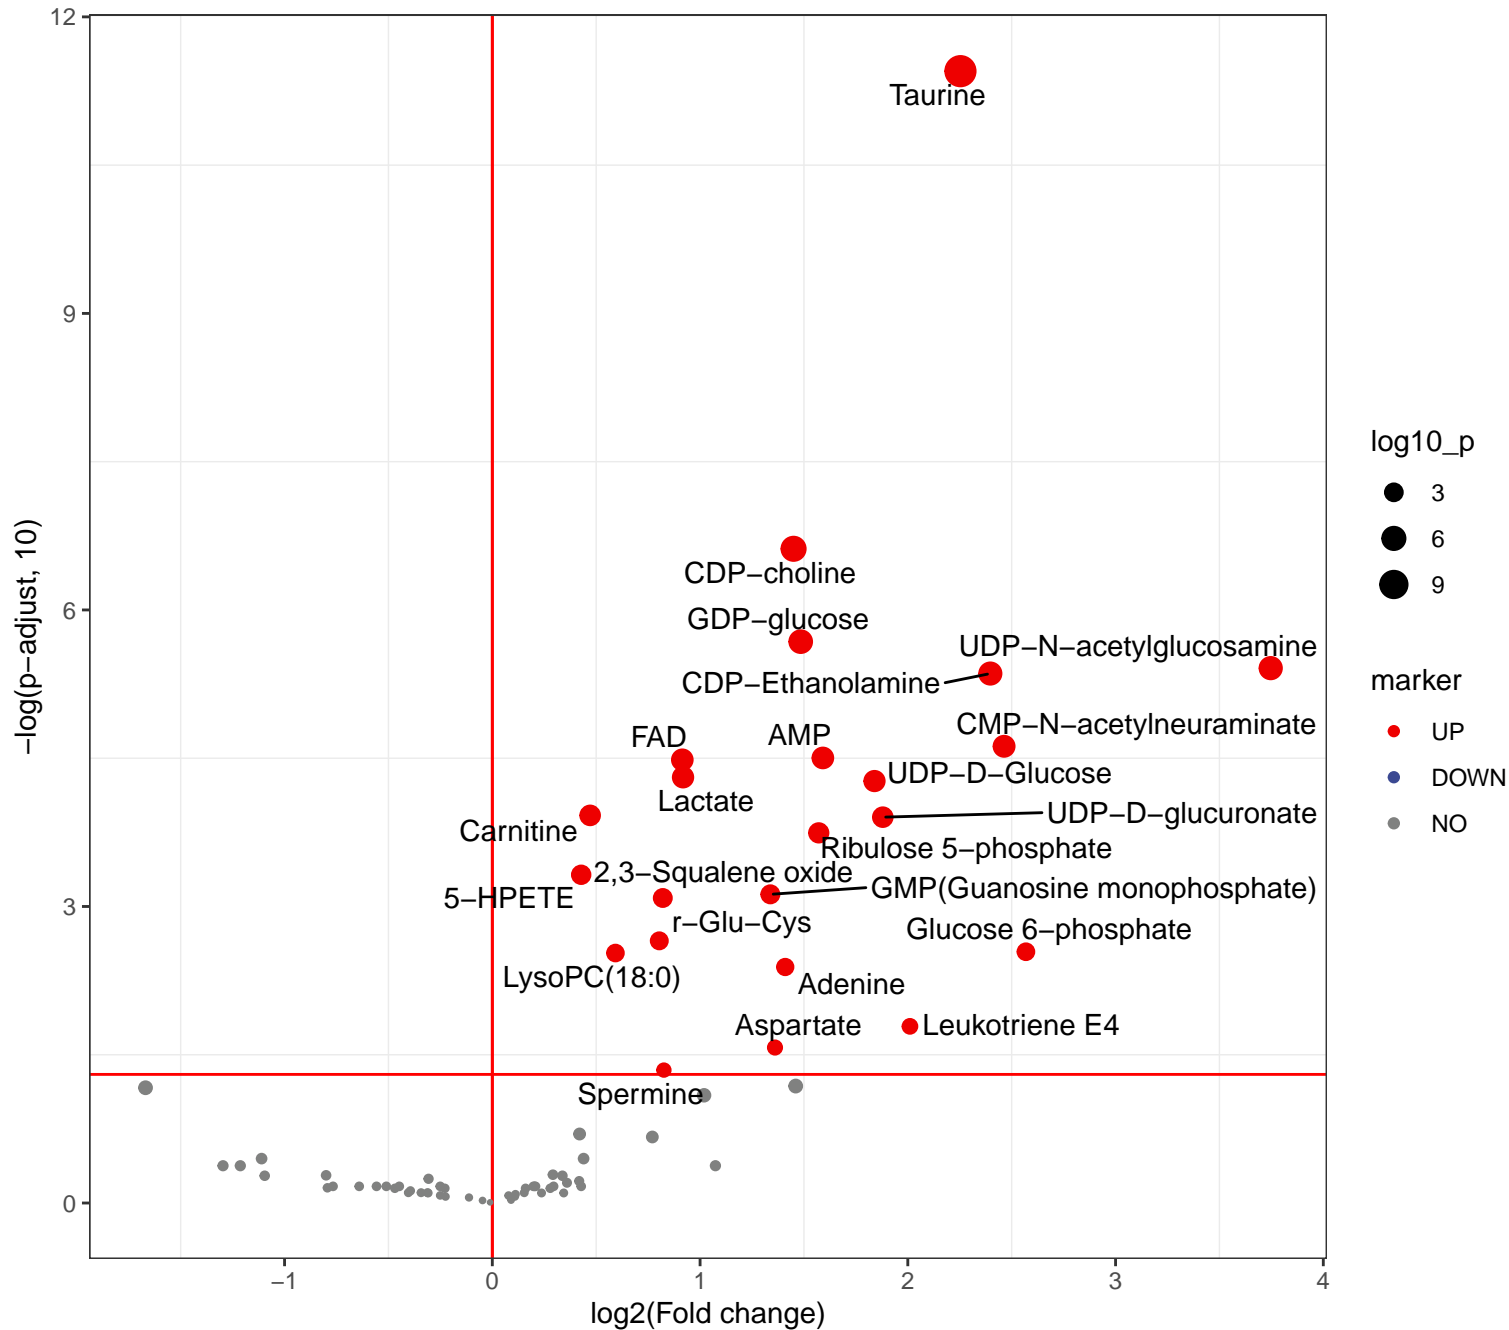

Supplement: Supplementary file 7 [file female_LCC_vs_femal_control.pdf › Supplementary Data 1/statistical_analysis/female_LCC_vs_femal_control.pdf]

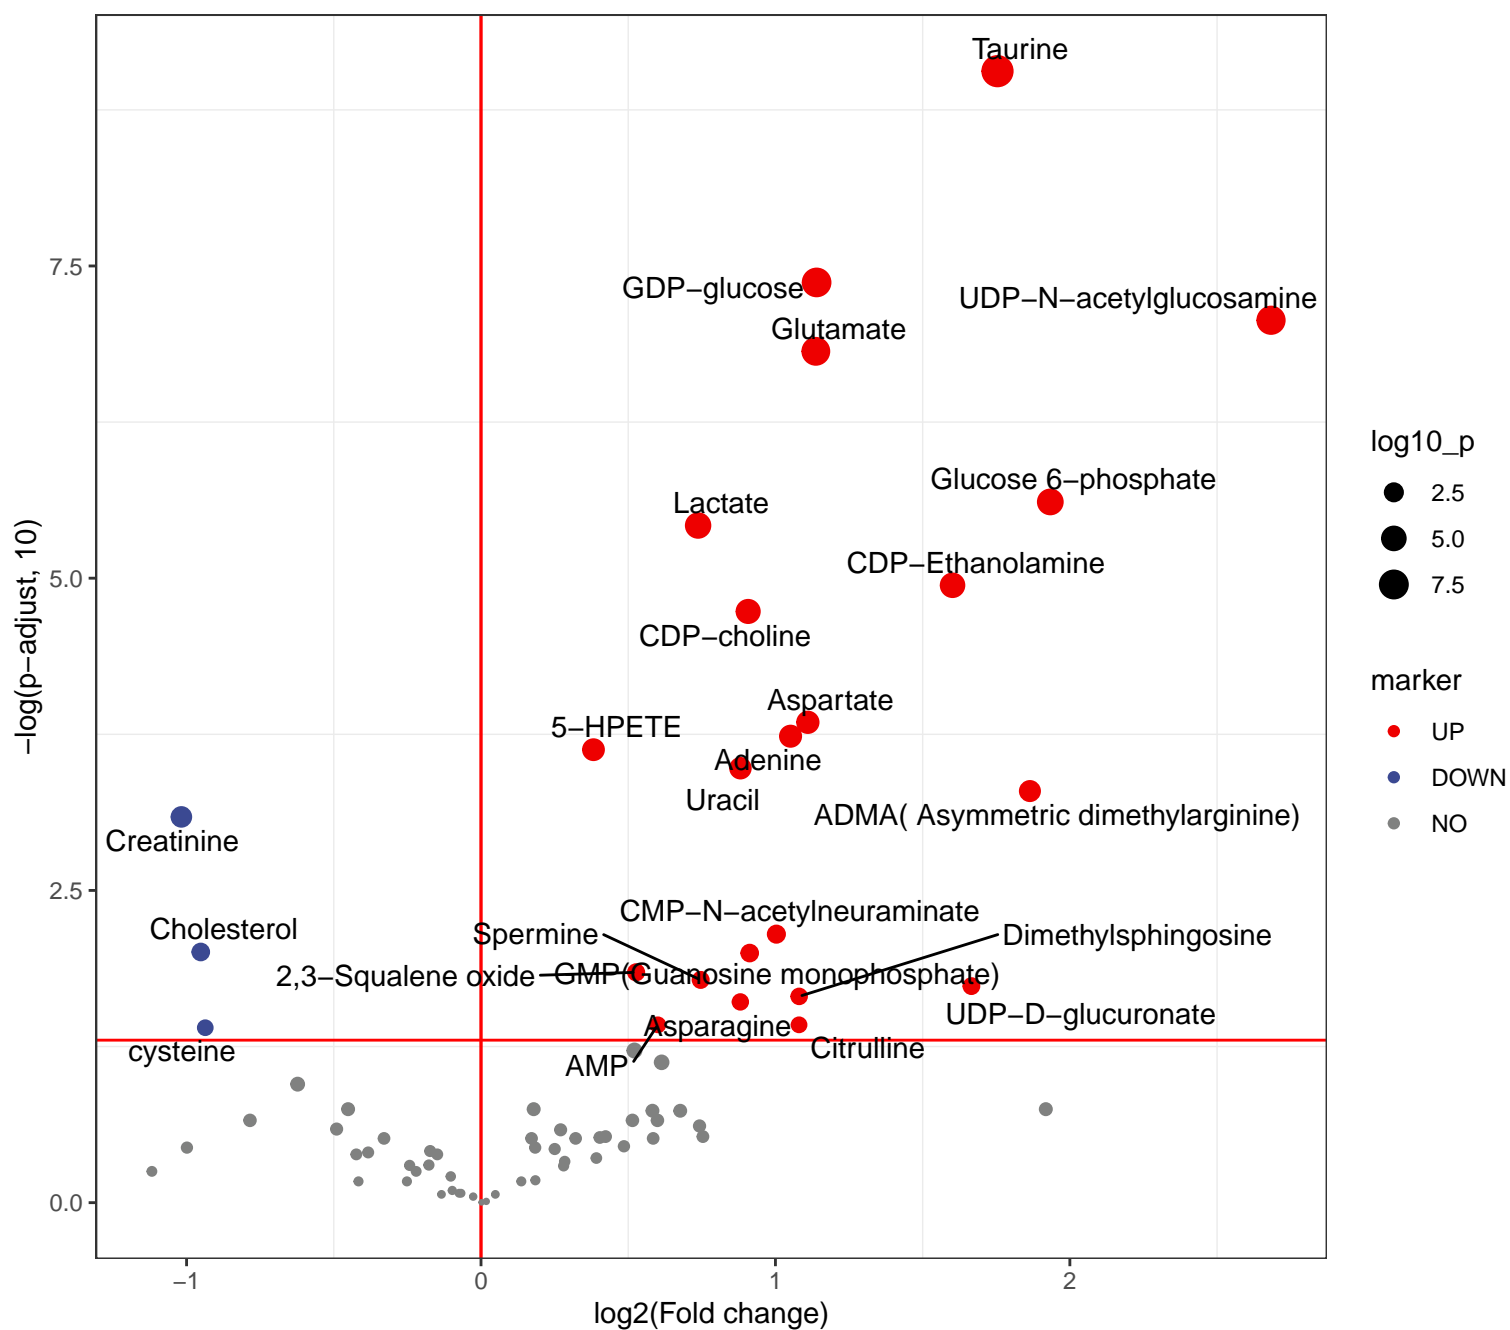

Supplement: Supplementary file 8 [file male_LCC_vs_male_control.pdf › Supplementary Data 1/statistical_analysis/male_LCC_vs_male_control.pdf]
